# Supplementary material for: Canonical and Noncanonical Sites Determine NPT2A Binding Selectivity to NHERF1 PDZ1
Source: PLOS journal article supplement (doi:10.1371/journal.pone.0129554), 2015-06-12

## Supporting Information Figure S7

**His<sup>-5</sup>/Ala<sup>-5</sup> and His<sup>-6</sup>/Ala<sup>-6</sup> mutations in NPT2A destabilize the PDZ1-NPT2A complex.**

The RMSF values of the Ca atoms of PDZ1 **(A)** and the NPT2A peptide **(B)** with respect to the initial structure are presented.

**A**

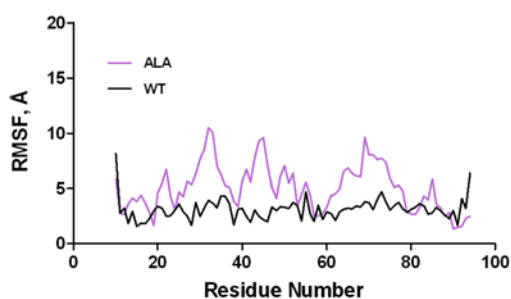

**B**

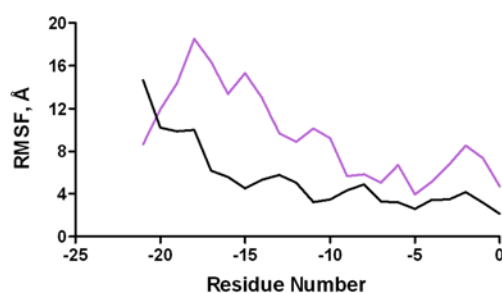

Supplement: S7 (10.1371/journal.pone.0129554.s007) [file journal.pone.0129554.s007]
